# Supplementary material
Source: Royal Society of Chemistry journal article supplement (https://www.rsc.org/suppdata/p2/1999/1797/900204i.doc)
Supplement: Supplementary file 1 [file 900204i.doc]

***Supplementary Data to :***

**Interactions Between Aminocalixarenes and Nucleotides or Nucleic Acids**

by Youheng Shi, Hans-Jörg Schneider *

FR Organische Chemie, Universität des Saarlandes, D-66041 Saarbrücken, Germany

**NMR Data and elemental analyses**

(Elemental analyses were hampered by the hygroscopicity of the ammonium chlorides).

**AC4a** (D2O, TMS) 1H NMR 7.16 (8H, s, Ar*H*), 4.24 (8H, s, ArC*H*2Ar), 3.62 (8H, s, ArC*H*2N+), 3.44 (12H, s, OC*H*3), 2.85 (36H, s, N+(C*H*3)3); 13C NMR 159.27 (*Ar*O), 134.70 (*Ar*), 134.41 (*Ar*), 120.85 (*Ar*), 69.10 (O*C*H3), 58.42 (*C*H2N+), 51.98 (N+*C*H3), 35.07 (Ar*C*H2Ar).

**AC4c** (D2O, TMS) 1H NMR 6.73 (8H, s, Ar*H*), 4.38 (4H, d, ArC*H*2Ar, *J* = 13.2 Hz), 3.98 (8H, s, ArC*H*2N+), 3.80 (8H, t, OC*H*2), 3.22 (4H, d, ArC*H*2Ar, *J* = 12.8 Hz), 2.68 (36H, s, N+(C*H*3)3), 1.80 ( 8H, m, CH2C*H*2CH3) 0.81(12H, t, CH2C*H*3); 13C NMR 158.24 (*Ar*O), 134.90 (*Ar*), 132.61 (*Ar*), 123.46 (*Ar*), 121.35 (*Ar*), 68.66 (O*C*H2), 60.10 (*C*H2N+), 51.85 (N+*C*H3), 29.72 (Ar*C*H2Ar), 22.96 (CH2*C*H2CH3), 10.02 (CH2*C*H3).

**AC6** (D2O, TMS) 1H NMR 7.00, 6.97 (12H, bd, Ar*H*), 4.11 (12H, s, ArC*H*2N+), 3.87 (12H, m, ArC*H*2Ar), 3.24 (18H, m, OC*H*3), 2.83 (54H, s, N+(C*H*3)3); 13C NMR 157.50 (*Ar*O), 134.59 (*Ar*), 134.47 (*Ar*), 133.37(*Ar*), 131.66 (*Ar*), 125.11 (*Ar*), 122.99 (*Ar*), 68.68 (O*C*H3), 60.13, 59.97 (*C*H2N+), 51.96 (N+*C*H3), 30.09 (Ar*C*H2Ar);Calc. for (C12H18NOCl) 6,  C, 63.29; H, 7.97; N: 6.15; Found, C,62.75; H, 8.02, N, 6.10

**AC8** (D2O, TMS) 1H NMR 7.07, 6.93 (16H, bd, Ar*H*), 4.18 (16H, s, ArC*H*2N+), 3.76 (16H, s, ArC*H*2Ar), 3.18 (24H, bs, OC*H*3), 2.79 (72H, s, N+(C*H*3)3); 13C NMR 157.97 (*Ar*O), 134.63 (*Ar*), 133.82 (*Ar*), 131.54 (*Ar*), 123.08 (*Ar*), 68.77 (O*C*H3), 60.11 (*C*H2N+), 52.04 (N+*C*H3), 30.82 (Ar*C*H2Ar); Calc. for (C12H18NOCl)8, C, 63.29; H, 7.97; N: 6.15; Found, C,62.54; H, 8.05, N, 5.99. FAB-MS : strong peak at 1821 Dalton , calcd. 1821.87 Dalton.

*Tables 9 to 12 :*

**Table 9.**  NMR Shifts (0), Complexation-Induced Shifts (*CIS*), and Equilibrium Constants (*K*,M-1) and Binding Free Energy (*G,* kJ/mol) of Selected Nucleotides with the **AC6a**

| cmpd |  | H-5 | H-6 | H-8 | CH3 | H-1‘ | Kav and G av |
| --- | --- | --- | --- | --- | --- | --- | --- |
| GMP2- | 0 |  |  | 8.00 |  | 5.75 |  |
|  | CIS |  |  | -0.042 |  | -0.059 |  |
|  | K10-3 |  |  | 9.42.5 |  | 8.61.7 | 8.91.8 |
|  | G |  |  | 22.6 |  | 22.4 | 22.5 |
| UMP2- | 0 | 7.94 | 5.82 |  |  | 5.80 |  |
|  | CIS | -0.064 | -0.062 |  |  | -0.065 |  |
|  | K10-3 | 6.40.9 | 3.40.4 |  |  | 3.70.4 | 4.50.6 |
|  | G | 21.7 | 20.1 |  |  | 20.3 | 20.8 |
| CMP2- | 0 | 5.95 | 7.92 |  |  | 5.82 |  |
|  | CIS | -0.061 | -0.065 |  |  | -0.059 |  |
|  | K10-3 | 3.60.7 | 6.91.9 |  |  | 2.40.4 | 4.31.0 |
|  | G | 20.3 | 21.9 |  |  | 19.3 | 20.7 |
| TMP2- | 0 |  | 7.62 |  | 1.74 | 6.16 |  |
|  | CIS |  | - 0.090 |  | - 0.070 | -0.050 |  |
|  | K10-3 |  | 3.40.6 |  | 1.90.3 | 3.20.5 | 2.80.5 |
|  | G |  | 20.1 |  | 18.7 | 20.0 | 19.6 |

a See footenote to table 1.

**Table 10.**  NMR Shifts (0), Complexation-Induced Shifts (CIS), and Equilibrium Constants (*K*,M-1) and Binding Free Energy (*G,* kJ/mol) of Selected Nucleotides with the **AC8 a**

| cmpd |  | H-5 | H-6 | H-8 | CH3 | H-1‘ | Kav and G av |
| --- | --- | --- | --- | --- | --- | --- | --- |
| GMP2- | 0 |  |  | 8.00 |  | 5.75 |  |
|  | CIS |  |  | -0.051 |  | -0.061 |  |
|  | K10-3 |  |  | 2515 |  | 2712 | 2613 |
|  | G |  |  | 25.1 |  | 25.3 | 25.2 |
| UMP2- | 0 | 7.94 | 5.82 |  |  | 5.80 |  |
|  | CIS | -0.059 | -0.060 |  |  | -0.064 |  |
|  | K10-3 | 208 | 8.42.3 |  |  | 112.7 | 134.3 |
|  | G | 24.5 | 22.4 |  |  | 23.0 | 23.5 |
| CMP2- | 0 | 5.95 | 7.92 |  |  | 5.82 |  |
|  | CIS | -0.060 | -0.062 |  |  | -0.050 |  |
|  | K10-3 | 123.2 | 155 |  |  | 145.5 | 134.6 |
|  | G | 23.3 | 23.8 |  |  | 23.6 | 23.5 |
| TMP2- | 0 |  | 7.62 |  | 1.74 | 6.16 |  |
|  | CIS |  | -0.080 |  | -0.070 | -0.050 |  |
|  | K10-3 |  | 132.7 |  | 5.00.9 | 9.11.7 | 9.01.8 |
|  | G | 23.5 |  |  | 21.1 | 22.6 | 22.5 |

a See footenote to table 1.

**Table 11** NMR Shifts(*CIS* values) on **AC6** Induced by complexation with Nucleotidesa

|  | ArH | ArCH2Ar | ArCH2N | OCH3 | N(CH3) 3 |
| --- | --- | --- | --- | --- | --- |
| AMP2- | -0.112 |  |  | -0.140 | -0.034 |
| ADP3- | -0.10 | -0.033 | -0.13 | -0.111 | -0.026 |
| ATP4- | -0.135 |  | -0.13 | -0.176 |  |
|  |  |  |  |  |  |
| GMP2- | -0.097 |  |  | -0.145 | -0.081 |
| TMP2- | -0.030 |  | -0.031 | -0.051 |  |
| CMP2- | -0.047 |  |  | -0.038 | -0.024 |
| UMP2- | -0.022 |  |  | -0.028 | -0.017 |

a See footenote to table 1.

**Table 12**. Binding Constants(*K*, M-1) and Binding Free Energy (*G,* kJ/mol) determined by fluorescence titrationa

|  | AC4a | AC6 | AC8 |
| --- | --- | --- | --- |
| ANS1- | 2800  120 | 5000  400 | 22000 1000 |
| G | 19.6 | 21.1 | 24.8 |
| ADP3- | 3000 | 17000 | 40000 |
| G | 19.8 | 24.1 | 26.2 |
| ATP4- | 8000 | 60000 | 72000 |
| G | 22.3 | 27.2 | 27.7 |

a In H2O at pH 7.0 at 298 K.
